# Supplementary material for: Use of nanohybrid nanomaterials in water treatment: highly efficient removal of ranitidine
Source: Royal Society of Chemistry journal article supplement (doi:10.1039/d0ra05530a), 2020-01-01
Supplement: d0ra05530a1.pdf [file d0ra05530a1.pdf]

1 **SUPPLEMENTARY MATERIALS**

2 **Table 1S:** FTIR of graphene oxide (GO), oxidized carbon nanotubes (OCNTs) and nanohybrid GO-  
3 OCNTs

| <b>Nanomaterial</b>                  | <b>Wavenumber<br/>(cm<sup>-1</sup>)</b> | <b>Functional group</b>                |
|--------------------------------------|-----------------------------------------|----------------------------------------|
| Graphene oxide<br>(GO)               | 3447                                    | O–H Stretching                         |
|                                      | 3042                                    | Aromatic C–H stretching                |
|                                      | 2979                                    | Asymmetric C–H stretching              |
|                                      | 2886                                    | Symmetric C–H stretching               |
|                                      | 1711                                    | C=O Stretching                         |
|                                      | 1645                                    | Conjugated C=C stretching              |
|                                      | 1632                                    | Asymmetric COO <sup>-</sup> stretching |
|                                      | 1385                                    | Symmetric COO <sup>-</sup> stretching  |
|                                      | 1031                                    | COC stretching                         |
| Oxidized carbon nanotubes<br>(OCNTs) | 3451                                    | O–H Stretching                         |
|                                      | 3031                                    | Aromatic C–H stretching                |
|                                      | 2975                                    | Asymmetric C–H stretching              |
|                                      | 2882                                    | Symmetric C–H stretching               |
|                                      | 1709                                    | C=O Stretching                         |
|                                      | 1649                                    | Conjugated C=C stretching              |
|                                      | 1625                                    | Asymmetric COO <sup>-</sup> stretching |
|                                      | 1385                                    | Symmetric COO <sup>-</sup> stretching  |
|                                      | 1080                                    | COC stretching                         |
| Nanohybrid<br>GO-OCNTs               | 3342                                    | O–H Stretching                         |
|                                      | 3005                                    | Aromatic C–H stretching                |
|                                      | 2918                                    | Asymmetric C–H stretching              |
|                                      | 2851                                    | Symmetric C–H stretching               |
|                                      | 1734                                    | C=O Stretching                         |
|                                      | 1644                                    | Conjugated C=C stretching              |
|                                      | 1632                                    | Asymmetric COO <sup>-</sup> stretching |
|                                      | 1346                                    | Symmetric COO <sup>-</sup> stretching  |
|                                      | 1067                                    | COC stretching                         |

4

5

6
